# Supplementary material for: Theoretical DFT Investigation of Structure and Electronic Properties of η5-Cyclopentadienyl Half-Sandwich Organochalcogenide Complexes
Source: MDPI journal article supplement (doi:10.3390/electronics12122738), 2023-06-19
Supplement: s1 [file s1]

# Theoretical DFT Investigation of Structure and Electronic Properties of $\eta^5$ -Cyclopentadienyl Half-sandwich Organochalcogenide Complexes

## Supplementary Information

G.T. Oyeniyi<sup>1</sup>, Iu.A. Melchakova<sup>2</sup>, S.P. Polyutov<sup>3</sup>, and P.V. Avramov<sup>1,\*</sup>

<sup>1</sup> *Department of Chemistry, Kyungpook National University, 80 Daehak-ro, Daegu 41566, Republic Korea*

<sup>2</sup> *School of Physics and Engineering, ITMO University, St Petersburg 197101, Russia*

<sup>3</sup> *International Research Center of Spectroscopy and Quantum Chemistry at Siberian Federal University, Krasnoyarsk, Russia*

**Table S1.** Total energy (in *a.u.*) for Cp fragment ( $E_{F1}$ ), EPh<sub>3</sub> fragments ( $E_{F2}$ ) and  $E_P$  for [Cp][(EPh<sub>3</sub>)].

| Complexes                                      | $E_{F1(Cp)}$ | $E_{F2(EPh_3)}$ | $E_P(Cp(EPh_3))$ |
|------------------------------------------------|--------------|-----------------|------------------|
| [Cp][(TePh <sub>3</sub> )] (1)                 | -193.4990    | -963.1264       | -1156.5299       |
| [Cp <sup>Me4</sup> ][(TePh <sub>3</sub> )] (2) | -350.8071    | -963.1264       | -1313.8443       |
| [Cp <sup>Me5</sup> ][(TePh <sub>3</sub> )] (3) | -390.1351    | -963.1264       | -1353.1736       |
| [Cp][(SePh <sub>3</sub> )] (4)                 | -193.4990    | -1068.3049      | -1261.7039       |
| [Cp <sup>Me5</sup> ][(SePh <sub>3</sub> )] (5) | -390.1351    | -1068.3049      | -1458.3473       |

Atomic coordinates of all  $\eta^5$ -cyclopentadienyl half-sandwich organochalcogenides complexes optimized at *ab initio* TPSS/(cc-pVTZ-PP/6-31G\*)

[Cp][(TePh<sub>3</sub>)]

|   |                       |                       |                       |
|---|-----------------------|-----------------------|-----------------------|
| C | - 1.8 5 9 9 1 5 0 0 0 | - 0.4 0 1 3 8 8 0 0 0 | - 6.2 1 1 9 9 3 0 0 0 |
| C | - 3.0 7 2 7 2 7 0 0 0 | 0.2 2 3 7 8 2 0 0 0   | - 6.5 4 1 5 5 4 0 0 0 |

|   |              |              |              |
|---|--------------|--------------|--------------|
| C | -1.327350000 | -0.257012000 | -4.923192000 |
| H | -3.494131000 | 0.111768000  | -7.540239000 |
| H | -0.385120000 | -0.738726000 | -4.662687000 |
| C | -3.747273000 | 0.998341000  | -5.587194000 |
| C | -2.004918000 | 0.504097000  | -3.956298000 |
| H | -4.683282000 | 1.489810000  | -5.844774000 |
| H | -1.593939000 | 0.600088000  | -2.953353000 |
| C | -3.215379000 | 1.130904000  | -4.292436000 |
| H | -1.333435000 | -0.997380000 | -6.956708000 |
| C | -2.173869000 | 2.245327000  | -0.660392000 |
| C | -3.181868000 | 1.445629000  | -1.230922000 |
| C | -1.380150000 | 1.751339000  | 0.387728000  |
| H | -0.599693000 | 2.376843000  | 0.821011000  |
| C | -3.398226000 | 0.147879000  | -0.733462000 |
| C | -1.598845000 | 0.455607000  | 0.877037000  |
| H | -4.180626000 | -0.477564000 | -1.160667000 |
| H | -0.988263000 | 0.070266000  | 1.693193000  |
| C | -2.609581000 | -0.342949000 | 0.317919000  |
| H | -2.783906000 | -1.348761000 | 0.700804000  |
| H | -2.002436000 | 3.258620000  | -1.031291000 |
| C | -6.844735000 | -1.269161000 | -3.011295000 |
| C | -8.027378000 | -0.842352000 | -2.389179000 |
| C | -5.763568000 | -0.385263000 | -3.158391000 |
| H | -8.864027000 | -1.531320000 | -2.278534000 |
| H | -4.846240000 | -0.716663000 | -3.641826000 |
| C | -8.135039000 | 0.474344000  | -1.915723000 |
| C | -5.877046000 | 0.930921000  | -2.680985000 |
| H | -9.053429000 | 0.810320000  | -1.435021000 |
| C | -7.062366000 | 1.365387000  | -2.066619000 |

|    |              |              |              |
|----|--------------|--------------|--------------|
| H  | -7.152345000 | 2.396057000  | -1.723607000 |
| H  | -6.760182000 | -2.289365000 | -3.385324000 |
| C  | -5.829110000 | 3.603945000  | -4.748287000 |
| C  | -6.374360000 | 4.340306000  | -3.646208000 |
| C  | -5.453826000 | 5.355296000  | -3.303463000 |
| C  | -4.344887000 | 5.272936000  | -4.186869000 |
| C  | -4.575173000 | 4.209900000  | -5.090878000 |
| H  | -6.348145000 | 2.828829000  | -5.308597000 |
| H  | -7.342184000 | 4.160670000  | -3.185190000 |
| H  | -5.568234000 | 6.069063000  | -2.490767000 |
| H  | -3.462091000 | 5.907496000  | -4.165376000 |
| H  | -3.916363000 | 3.891372000  | -5.894921000 |
| Te | -4.295896000 | 2.390018000  | -2.891007000 |

**[Cp<sup>Me4</sup>][(TePh<sub>3</sub>)]**

|   |              |              |              |
|---|--------------|--------------|--------------|
| C | 0.829495000  | -0.454103000 | 4.452869000  |
| C | 0.311929000  | 0.727612000  | 3.899942000  |
| C | 1.138946000  | -1.540061000 | 3.620448000  |
| H | 0.076351000  | 1.576145000  | 4.542149000  |
| H | 1.546896000  | -2.456796000 | 4.045868000  |
| C | 0.092238000  | 0.819677000  | 2.517881000  |
| C | 0.933339000  | -1.449006000 | 2.234444000  |
| H | -0.310619000 | 1.733948000  | 2.084950000  |
| H | 1.196570000  | -2.284309000 | 1.585908000  |
| C | 0.411246000  | -0.267219000 | 1.687848000  |
| H | 0.993396000  | -0.526946000 | 5.527477000  |
| C | 1.628119000  | -2.602367000 | -1.024831000 |
| C | 1.758659000  | -1.206546000 | -0.888498000 |

|    |              |              |              |
|----|--------------|--------------|--------------|
| C  | 2.746228000  | -3.399771000 | -1.317608000 |
| H  | 2.634853000  | -4.479971000 | -1.413396000 |
| C  | 3.017035000  | -0.611737000 | -1.081557000 |
| C  | 4.001312000  | -2.800620000 | -1.497094000 |
| H  | 3.131355000  | 0.468178000  | -1.002585000 |
| H  | 4.870955000  | -3.414046000 | -1.731237000 |
| C  | 4.132714000  | -1.407575000 | -1.385652000 |
| H  | 5.105533000  | -0.938570000 | -1.535759000 |
| H  | 0.649583000  | -3.075320000 | -0.905381000 |
| C  | 2.359534000  | 3.511127000  | 0.071221000  |
| C  | 1.840492000  | 4.362346000  | -0.917136000 |
| C  | 1.837697000  | 2.218741000  | 0.234428000  |
| H  | 2.245912000  | 5.366377000  | -1.037955000 |
| H  | 2.233400000  | 1.557802000  | 1.003740000  |
| C  | 0.795495000  | 3.923503000  | -1.743777000 |
| C  | 0.793948000  | 1.780812000  | -0.599304000 |
| H  | 0.386870000  | 4.584412000  | -2.507798000 |
| C  | 0.268295000  | 2.632745000  | -1.582678000 |
| H  | -0.560973000 | 2.291439000  | -2.202959000 |
| H  | 3.168073000  | 3.852152000  | 0.717683000  |
| C  | -2.589745000 | 0.996312000  | -0.060590000 |
| C  | -2.690037000 | 0.781622000  | -1.478563000 |
| C  | -2.944828000 | -0.587081000 | -1.719742000 |
| C  | -2.999546000 | -1.247489000 | -0.460356000 |
| C  | -2.808798000 | -0.278349000 | 0.565945000  |
| H  | -2.635511000 | 1.559890000  | -2.238086000 |
| Te | -0.141790000 | -0.168350000 | -0.407412000 |
| C  | -3.116593000 | -1.245580000 | -3.064474000 |
| H  | -2.746810000 | -0.597380000 | -3.872146000 |

|   |              |              |              |
|---|--------------|--------------|--------------|
| H | -2.572097000 | -2.202059000 | -3.119172000 |
| H | -4.176217000 | -1.470347000 | -3.276260000 |
| C | -3.258656000 | -2.715476000 | -0.240452000 |
| H | -2.860117000 | -3.319938000 | -1.070232000 |
| H | -2.795164000 | -3.065671000 | 0.694565000  |
| H | -4.338162000 | -2.938364000 | -0.169378000 |
| C | -2.885593000 | -0.557827000 | 2.043670000  |
| H | -2.263261000 | -1.422229000 | 2.325880000  |
| H | -2.537333000 | 0.299272000  | 2.634571000  |
| H | -3.920431000 | -0.784093000 | 2.352588000  |
| C | -2.532484000 | 2.340730000  | 0.623085000  |
| H | -2.404341000 | 2.226494000  | 1.708926000  |
| H | -1.703375000 | 2.959720000  | 0.244584000  |
| H | -3.464889000 | 2.907896000  | 0.462048000  |

**[Cp<sup>Me5</sup>][(TePh<sub>3</sub>)]**

|   |             |              |             |
|---|-------------|--------------|-------------|
| C | 0.995354000 | 2.269705000  | 3.891112000 |
| C | 0.978675000 | 3.004912000  | 2.695713000 |
| C | 0.802638000 | 0.880245000  | 3.861165000 |
| H | 1.130117000 | 4.083975000  | 2.714463000 |
| H | 0.816548000 | 0.305836000  | 4.787270000 |
| C | 0.760724000 | 2.353989000  | 1.472910000 |
| C | 0.592170000 | 0.222010000  | 2.639173000 |
| H | 0.742284000 | 2.927292000  | 0.545590000 |
| H | 0.443813000 | -0.856246000 | 2.615171000 |
| C | 0.577115000 | 0.960901000  | 1.445382000 |
| H | 1.156809000 | 2.777696000  | 4.841172000 |
| C | 0.037988000 | -2.983151000 | 0.156790000 |

|    |              |              |              |
|----|--------------|--------------|--------------|
| C  | 0.852247000  | -1.843402000 | 0.210101000  |
| C  | 0.550090000  | -4.227711000 | 0.559111000  |
| H  | -0.082366000 | -5.114208000 | 0.515387000  |
| C  | 2.177883000  | -1.935849000 | 0.664170000  |
| C  | 1.871619000  | -4.324376000 | 1.016900000  |
| H  | 2.808094000  | -1.048915000 | 0.696702000  |
| H  | 2.270632000  | -5.288359000 | 1.331224000  |
| C  | 2.683976000  | -3.179086000 | 1.069336000  |
| H  | 3.712111000  | -3.254577000 | 1.423422000  |
| H  | -0.988005000 | -2.894389000 | -0.192896000 |
| C  | 4.126662000  | 1.510099000  | -1.376002000 |
| C  | 4.163196000  | 1.374528000  | -2.772265000 |
| C  | 2.972825000  | 1.150448000  | -0.661748000 |
| H  | 5.059282000  | 1.656021000  | -3.324710000 |
| H  | 2.948177000  | 1.267885000  | 0.421329000  |
| C  | 3.041208000  | 0.883330000  | -3.456345000 |
| C  | 1.847701000  | 0.648833000  | -1.340776000 |
| H  | 3.062815000  | 0.781565000  | -4.541452000 |
| C  | 1.886455000  | 0.528228000  | -2.742052000 |
| H  | 1.013519000  | 0.155976000  | -3.283690000 |
| H  | 4.994926000  | 1.897119000  | -0.841960000 |
| C  | -2.748176000 | 1.361432000  | -0.818893000 |
| C  | -2.955292000 | 0.196638000  | -1.611791000 |
| C  | -2.885446000 | -0.939693000 | -0.768130000 |
| C  | -2.600374000 | -0.488579000 | 0.564895000  |
| C  | -2.553396000 | 0.950652000  | 0.529876000  |
| Te | -0.064013000 | 0.041337000  | -0.397699000 |
| C  | -3.187827000 | -2.355221000 | -1.194248000 |
| H  | -4.219887000 | -2.439478000 | -1.574276000 |

|   |              |              |              |
|---|--------------|--------------|--------------|
| H | -2.523483000 | -2.709820000 | -2.000152000 |
| H | -3.097339000 | -3.052382000 | -0.347582000 |
| C | -2.604446000 | -1.322616000 | 1.821423000  |
| H | -2.205626000 | -2.332342000 | 1.642482000  |
| H | -1.987961000 | -0.852700000 | 2.602293000  |
| H | -3.623094000 | -1.436781000 | 2.232443000  |
| C | -2.462576000 | 1.852316000  | 1.730888000  |
| H | -1.862464000 | 1.400926000  | 2.533898000  |
| H | -2.002116000 | 2.817733000  | 1.475139000  |
| H | -3.465326000 | 2.063652000  | 2.142933000  |
| C | -2.780189000 | 2.784443000  | -1.313452000 |
| H | -2.194234000 | 3.447224000  | -0.658936000 |
| H | -2.371839000 | 2.863757000  | -2.332897000 |
| H | -3.808296000 | 3.186060000  | -1.345744000 |
| C | -3.224201000 | 0.169047000  | -3.093866000 |
| H | -2.745339000 | 1.019170000  | -3.603789000 |
| H | -2.848365000 | -0.759666000 | -3.549992000 |
| H | -4.304335000 | 0.226018000  | -3.318766000 |

[Cp][(SePh<sub>3</sub>)]

|   |              |              |              |
|---|--------------|--------------|--------------|
| C | -2.078651000 | -0.535148000 | -6.220824000 |
| C | -3.013271000 | 0.491560000  | -6.427168000 |
| C | -1.768602000 | -0.952672000 | -4.917608000 |
| H | -3.248981000 | 0.822717000  | -7.438027000 |
| H | -1.036213000 | -1.743244000 | -4.755797000 |
| C | -3.639933000 | 1.102367000  | -5.331430000 |
| C | -2.396354000 | -0.353190000 | -3.813913000 |
| H | -4.345261000 | 1.922057000  | -5.470497000 |

|    |              |              |              |
|----|--------------|--------------|--------------|
| H  | -2.156907000 | -0.671971000 | -2.801074000 |
| C  | -3.333651000 | 0.666076000  | -4.034726000 |
| H  | -1.586995000 | -1.003124000 | -7.072911000 |
| C  | -2.071645000 | 1.895039000  | -0.812528000 |
| C  | -3.111549000 | 1.011456000  | -1.137877000 |
| C  | -1.182340000 | 1.558232000  | 0.217540000  |
| H  | -0.369089000 | 2.237245000  | 0.471669000  |
| C  | -3.288170000 | -0.190361000 | -0.438563000 |
| C  | -1.345135000 | 0.355950000  | 0.923789000  |
| H  | -4.105117000 | -0.862875000 | -0.691450000 |
| H  | -0.657889000 | 0.100057000  | 1.729388000  |
| C  | -2.397635000 | -0.512477000 | 0.598715000  |
| H  | -2.531157000 | -1.442084000 | 1.151454000  |
| H  | -1.978303000 | 2.836436000  | -1.353471000 |
| C  | -6.681044000 | -1.931138000 | -2.577307000 |
| C  | -7.845588000 | -1.467073000 | -1.945793000 |
| C  | -5.596451000 | -1.064926000 | -2.786152000 |
| H  | -8.684882000 | -2.143786000 | -1.789182000 |
| H  | -4.694497000 | -1.418594000 | -3.282218000 |
| C  | -7.934150000 | -0.130910000 | -1.526325000 |
| C  | -5.693943000 | 0.265506000  | -2.352847000 |
| H  | -8.841052000 | 0.233067000  | -1.044485000 |
| C  | -6.857801000 | 0.744053000  | -1.735114000 |
| H  | -6.914734000 | 1.792718000  | -1.440702000 |
| H  | -6.615631000 | -2.966035000 | -2.912471000 |
| Se | -4.288021000 | 1.650969000  | -2.599084000 |
| C  | -4.567919000 | 4.197806000  | -3.950467000 |
| C  | -5.835859000 | 4.004788000  | -3.347530000 |
| C  | -5.670423000 | 4.101385000  | -1.936514000 |



|   |              |             |              |
|---|--------------|-------------|--------------|
| C | -4.299327000 | 4.360236000 | -1.671412000 |
| C | -3.612048000 | 4.405503000 | -2.914300000 |
| H | -4.360877000 | 4.212625000 | -5.018739000 |
| H | -6.774051000 | 3.830487000 | -3.870259000 |
| H | -6.462924000 | 4.042139000 | -1.192427000 |
| H | -3.854422000 | 4.497363000 | -0.688066000 |
| H | -2.553607000 | 4.616913000 | -3.055769000 |

**[Cp<sup>Me5</sup>][(SePh<sub>3</sub>)]**

|   |              |              |              |
|---|--------------|--------------|--------------|
| C | 3.039010000  | -1.746605000 | -3.330440000 |
| C | 2.053016000  | -2.549140000 | -2.739163000 |
| C | 3.174663000  | -0.404375000 | -2.946478000 |
| H | 1.942405000  | -3.591257000 | -3.036532000 |
| H | 3.938873000  | 0.221256000  | -3.406984000 |
| C | 1.200107000  | -2.008190000 | -1.767168000 |
| C | 2.330278000  | 0.141498000  | -1.968643000 |
| H | 0.421166000  | -2.617242000 | -1.308491000 |
| H | 2.433439000  | 1.185334000  | -1.678090000 |
| C | 1.347014000  | -0.668472000 | -1.383638000 |
| H | 3.697353000  | -2.163590000 | -4.091385000 |
| C | 0.007553000  | 2.366840000  | -1.506301000 |
| C | 0.245730000  | 1.829174000  | -0.230901000 |
| C | -0.080492000 | 3.756132000  | -1.664040000 |
| H | -0.253727000 | 4.174200000  | -2.654922000 |
| C | 0.361440000  | 2.667484000  | 0.887796000  |
| C | 0.048419000  | 4.602653000  | -0.552593000 |
| H | 0.522055000  | 2.244101000  | 1.877376000  |
| H | -0.026672000 | 5.681834000  | -0.677458000 |

|    |              |              |              |
|----|--------------|--------------|--------------|
| C  | 0.265882000  | 4.056125000  | 0.719773000  |
| H  | 0.359254000  | 4.708581000  | 1.587111000  |
| H  | -0.106622000 | 1.708297000  | -2.365287000 |
| C  | 3.483840000  | 0.124153000  | 2.602291000  |
| C  | 3.081957000  | -0.716797000 | 3.653087000  |
| C  | 2.633163000  | 0.345689000  | 1.511670000  |
| H  | 3.749292000  | -0.886177000 | 4.497205000  |
| H  | 2.942748000  | 0.995834000  | 0.695740000  |
| C  | 1.826543000  | -1.337543000 | 3.616696000  |
| C  | 1.376742000  | -0.276281000 | 1.487332000  |
| H  | 1.512916000  | -1.990612000 | 4.430292000  |
| C  | 0.967624000  | -1.115127000 | 2.529291000  |
| H  | -0.014235000 | -1.584560000 | 2.482410000  |
| H  | 4.461243000  | 0.605084000  | 2.631238000  |
| Se | 0.021667000  | -0.111511000 | 0.013790000  |
| C  | -2.348192000 | -1.566114000 | -0.821057000 |
| C  | -2.268263000 | -1.884711000 | 0.564922000  |
| C  | -2.477973000 | -0.678670000 | 1.306637000  |
| C  | -2.689126000 | 0.383176000  | 0.374602000  |
| C  | -2.597145000 | -0.162757000 | -0.944013000 |
| C  | -2.291561000 | -2.537623000 | -1.973308000 |
| H  | -1.687005000 | -2.153772000 | -2.809493000 |
| H  | -1.862349000 | -3.503907000 | -1.671769000 |
| H  | -3.296514000 | -2.747629000 | -2.377843000 |
| C  | -2.877750000 | 0.566199000  | -2.234229000 |
| H  | -2.684982000 | 1.644258000  | -2.141980000 |
| H  | -2.259677000 | 0.185781000  | -3.061860000 |
| H  | -3.930306000 | 0.453889000  | -2.546948000 |
| C  | -3.025581000 | 1.809706000  | 0.725136000  |

|   |              |              |              |
|---|--------------|--------------|--------------|
| H | -2.584656000 | 2.104607000  | 1.688320000  |
| H | -2.652336000 | 2.514747000  | -0.031552000 |
| H | -4.114899000 | 1.966639000  | 0.807146000  |
| C | -2.587025000 | -0.544162000 | 2.806475000  |
| H | -2.216100000 | -1.438891000 | 3.326082000  |
| H | -2.017297000 | 0.316077000  | 3.190788000  |
| H | -3.632961000 | -0.401566000 | 3.126210000  |
| C | -2.080673000 | -3.268675000 | 1.137739000  |
| H | -1.368377000 | -3.865159000 | 0.547681000  |
| H | -1.698473000 | -3.238642000 | 2.168455000  |
| H | -3.025471000 | -3.837685000 | 1.166835000  |
